# Supplementary material
Source: Springer Nature journal article supplement (https://www.springermedizin.de/resource/supplementary/12990_2014_671_MOESM6_ESM.pdf/9612348)

**A****Time Spent: Light-side**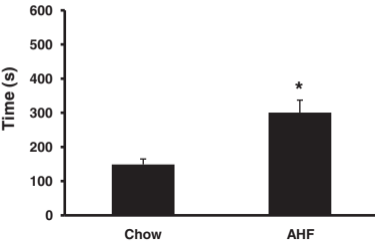**B****Dark/Light Transitions**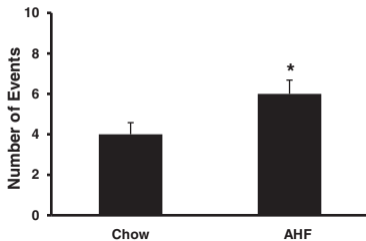**C****Time Spent: Light-side**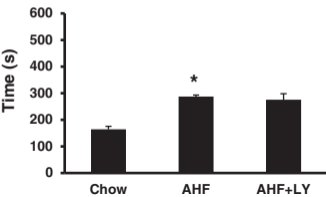**D****Dark/Light Transitions**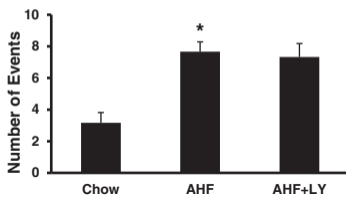

Supplement: MOESM6 [file 9612348]
